# Supplementary material for: Nitrogen application and different water regimes at booting stage improved yield and 2-acetyl-1-pyrroline (2AP) formation in fragrant rice
Source: Rice (N Y). 2019 Oct 3;12:74. doi: 10.1186/s12284-019-0328-4 (PMC6776583; doi:10.1186/s12284-019-0328-4)
Supplement: Supplementary file 1 — Table S1. PCA_loadings (XLSX 19 kb) [file 12284_2019_328_MOESM1_ESM.xlsx]

## Sheet: PCA_loadings
Supplementary Table 1 PCA_loadings
Parameters	PC1	PC2	PC3	PC4	PC5
2AP_G	0.027049	0.146	-0.064017	-0.035486	-0.023058
2AP_G_7 d AFH	0.1828	0.065861	0.094026	0.038346	-0.18064
2AP_G_14 d AFH	0.59889	0.1427	0.055131	-0.10959	0.19439
2AP_G_21 d AFH	0.48515	0.34937	0.047577	-0.0024184	0.15656
2AP_G_MS	0.26874	0.28085	-0.031361	0.025647	0.010189
2AP_L_FH	-0.426	0.44854	-0.093131	-0.16974	0.66162
2AP_L_7 d AFH	-0.17586	0.55202	-0.22702	-0.13001	-0.59397
2AP_L_14 d AFH	-0.0047414	0.034599	-0.45992	0.69662	0.1664
2AP_L_21 d AFH	-0.16184	0.37192	0.5735	0.49723	-0.15311
2AP_L_MS	-0.085846	0.15646	0.18883	-0.32206	0.031916
2AP_SS_FH	-0.080422	-0.12822	0.28811	-0.074882	-0.043913
2AP_SS_7 d AFH	-0.060215	-0.016125	0.097108	0.018668	-0.0033475
2AP_SS_14 d AFH	-0.052774	-0.12181	0.13886	-0.034643	-0.013085
2AP_SS_21 d AFH	-0.023032	0.10674	-0.05259	-0.03036	0.003672
2AP_SS_MS	0.0096979	0.056245	0.10779	-0.085929	0.063305
Pro_G_7 d AFH	0.017948	0.01139	0.014673	-0.0062748	0.0083649
Pro_G_14 d AFH	0.019857	0.0037504	0.010047	0.020314	0.0065153
Pro_G_21 d AFH	0.0082359	-0.0016705	0.0090716	-0.0067207	0.0043876
Pro_G_MS	0.0095818	-0.0020448	0.0083795	-0.001001	0.0081298
P5C_G_7 d AFH	-0.00045744	0.00031765	-3.8012e-05	0.00044447	-8.696e-05
P5C_G_14 d AFH	-0.00012151	0.00085667	-0.0003377	0.00052187	0.00050708
P5C_G_21 d AFH	-4.8996e-05	0.00093205	-0.00021044	0.00069407	-0.0001649
P5C_G_MS	-1.4977e-05	0.0012568	-0.0010673	0.0016088	-0.00022042
PDH_G_7 d AFH	-0.0057216	0.0011718	-0.0054509	0.0011658	0.00021474
PDH_G_14 d AFH	-0.0061301	0.0011665	-0.00043062	0.0051605	-0.003969
PDH_G_21 d AFH	-0.0081103	0.00098649	-0.0024374	-0.01242	-0.0020692
PDH_G_MS	-0.010088	-0.0019682	0.0018112	0.0015325	-0.0016541
P5CS_G_7 d AFH	-0.010497	0.014539	0.0087761	0.021415	0.011043
P5CS_G_14 d AFH	-0.013389	0.018531	0.0051638	-0.013641	0.0096312
P5CS_G_21 d AFH	-0.0065412	0.023839	0.012471	-0.0045046	-0.0051704
P5CS_G_MS	-0.021528	0.023985	0.019216	0.012138	-0.0026496
DAO_G_7 d AFH	0.055908	0.035384	0.065982	0.006678	0.040442
DAO_G_14 d AFH	0.01864	0.0029261	0.11738	-0.068898	0.052869
DAO_G_21 d AFH	-0.091481	-0.083438	0.24451	0.049915	0.11825
DAO_G_MS	0.011679	-0.053442	0.16948	0.062553	0.069482
OAT_G_7 d AFH	-0.0011655	-0.0062366	0.018246	-0.0013162	0.0046667
OAT_G_14 d AFH	0.006948	-0.0029117	0.011981	0.0080064	0.0047352
OAT_G_21 d AFH	0.0013315	-0.0020709	0.014986	0.010195	0.0061479
OAT_G_MS	0.00075686	0.0040196	0.022488	0.0025084	0.0048091
Pro_L_FH	0.001201	0.0007262	0.0022573	-0.005184	0.00103
Pro_L_7 d AFH	-0.0041841	0.0057281	-0.0074499	-0.012707	-0.0044093
Pro_L_14 d AFH	-0.0080617	-0.00092392	-0.0030296	-0.00078233	0.0012625
Pro_L_21 d AFH	-0.0024894	-0.018522	0.004685	-0.0086148	-0.0042329
Pro_L_MS	0.011678	-0.017993	0.0016757	-0.023714	-0.0089199
P5C_L_FH	0.001006	0.000638	-0.00075221	5.5872e-05	0.00026023
P5C_L_7 d AFH	0.00046169	0.0015982	-0.00052128	-0.00018321	0.00081958
P5C_L_14 d AFH	0.00088227	0.0011675	-0.00031739	0.00084475	0.00088708
P5C_L_21 d AFH	-3.3034e-05	0.00040861	0.00010494	0.00070499	0.00031401
P5C_L_MS	-8.6749e-05	0.00032662	-0.00076748	4.9206e-06	-0.00027355
PDH_L_FH	-0.0059696	-0.00051262	-0.0023707	0.00017228	-0.0015674
PDH_L_7 d AFH	-0.0065012	0.0047735	-0.0039836	-0.0027749	-0.0018427
PDH_L_14 d AFH	-0.0080958	0.0022402	-0.0023797	0.0010506	0.004298
PDH_L_21 d AFH	-0.0057852	0.0021055	-0.0043015	-0.0090664	-0.00016641
PDH_L_MS	-0.0095671	-0.0033417	-0.0030358	-0.0083131	-0.00030027
P5CS_L_FH	-0.020421	0.019338	-0.003876	-0.00023574	0.0071882
P5CS_L_7 d AFH	-0.019031	0.026548	0.0011486	0.010025	0.021194
P5CS_L_14 d AFH	-0.027724	0.014038	-0.0017337	0.00046294	0.022221
P5CS_L_21 d AFH	-0.020085	0.0053402	0.012214	0.0020491	-0.000661
P5CS_L_MS	-0.028172	-5.1115e-05	0.012268	-0.010544	0.014797
DAO_L_FH	0.014198	0.037663	0.1606	0.097646	0.043147
DAO_L_7 d AFH	-0.014554	0.0076493	0.17598	0.059643	0.1081
DAO_L_14 d AFH	0.0077546	0.035405	0.051352	0.072273	0.040452
DAO_L_21 d AFH	0.014912	0.044355	0.062949	0.10053	0.021051
DAO_L_MS	-0.024655	-0.0082761	0.11365	0.14799	0.032205
OAT_L_FH	0.0052288	0.0071885	0.020791	0.010549	0.0056981
OAT_L_7 d AFH	0.0012349	0.011891	0.026183	0.0098361	-0.0034484
OAT_L_14 d AFH	0.0050642	0.0092188	0.032755	0.014167	0.017945
OAT_L_21 d AFH	0.0080133	0.01555	0.031278	0.020484	0.014308
OAT_L_MS	-0.0012814	0.026507	0.029262	0.0080773	0.010951
Pro_SS_FH	-0.0030147	0.0051016	-0.012276	-0.020191	-0.015538
Pro_SS_7 d AFH	-0.010689	0.013322	-0.012506	-0.02155	0.0049691
Pro_SS_14 d AFH	-0.0025076	0.010727	-0.0054945	-0.0084783	-0.00045573
Pro_SS_21 d AFH	-0.0025589	0.011922	-0.010334	-0.0094568	-0.0056166
Pro_SS_MS	0.0073464	-0.0032802	0.0026262	-0.023303	0.0054857
P5C_SS_FH	0.0022816	0.0012562	-8.2586e-05	0.00032463	-0.00054524
P5C_SS_7 d AFH	0.0012929	0.0012711	-0.00036589	-0.00036505	-9.1905e-05
P5C_SS_14 d AFH	0.001144	0.0013411	-0.00038067	-0.00034605	0.00039642
P5C_SS_21 d AFH	0.0010317	0.00098577	0.00033577	0.00059579	-5.2026e-05
P5C_SS_MS	0.0019558	0.0014521	-0.00074327	0.00029106	1.3106e-05
PDH_SS_FH	-0.0015314	0.0042531	-0.00052914	-0.0038498	-0.0016898
PDH_SS_7 d AFH	-0.0049483	0.0044507	-0.00067785	-0.00034479	0.0017011
PDH_SS_14 d AFH	-0.008537	0.0013356	0.00017558	0.0010646	0.0012272
PDH_SS_21 d AFH	-0.0074232	0.006672	-0.004659	-0.0081562	-0.00092217
PDH_SS_MS	-0.0056744	-0.0015022	-0.0069585	-0.011541	-0.0027917
P5CS_SS_FH	-0.0075026	0.020491	0.0087654	-0.0070336	0.0099266
P5CS_SS_7 d AFH	-0.017112	0.042363	-0.013179	-0.027656	-0.0038253
P5CS_SS_14 d AFH	-0.017734	0.021498	0.011879	-0.0080237	0.0078017
P5CS_SS_21 d AFH	-0.00030502	0.026489	0.010269	0.0080674	0.0031072
P5CS_SS_MS	-0.022429	0.014118	0.012619	-0.012688	0.0049131
DAO_SS_FH	0.044223	0.021762	0.039157	0.028216	0.0022843
DAO_SS_7 d AFH	0.018727	-0.019481	0.10614	0.021168	0.065378
DAO_SS_14 d AFH	0.011856	0.0048322	-0.0052166	-0.049097	-0.021179
DAO_SS_21 d AFH	0.044106	-0.00034494	0.073186	0.005158	-0.014539
DAO_SS_MS	0.030001	-0.061408	0.032485	0.068778	0.010559
OAT_SS_FH	0.0097535	0.011014	0.0039321	0.0074974	0.0043119
OAT_SS_7 d AFH	-0.0013903	0.009521	0.01663	0.0055753	0.0074527
OAT_SS_14 d AFH	5.6819e-05	0.0012921	0.024082	0.01009	0.0054827
OAT_SS_21 d AFH	0.0039012	-0.00022047	0.017632	0.022322	0.002493
OAT_SS_MS	0.0019475	0.011115	0.011697	0.0049904	0.0049414
Pro_R_FH	0.00098649	0.002553	-0.0010978	-0.0019847	0.0018057
Pro_R_7 d AFH	0.0041994	0.0027618	0.0021996	0.0010925	-0.0012377
Pro_R_14 d AFH	-3.7965e-05	0.0010474	0.00054802	-0.0013396	0.00090719
Pro_R_21 d AFH	0.0072403	0.0019373	0.0013348	0.0060705	0.0030418
Pro_R_MS	0.0086738	0.0026973	0.0044718	-0.0038437	-0.0022678
P5C_R_FH	0.0018439	0.00097507	-0.0011364	0.0010384	-0.00016244
P5C_R_7 d AFH	0.0013845	0.0011584	-0.00038351	-0.00026971	0.00035299
P5C_R_14 d AFH	0.0013453	0.00085464	-0.00037874	0.0011057	0.0006486
P5C_R_21 d AFH	0.00065698	0.0015474	-6.2471e-05	3.0394e-05	0.00098708
P5C_R_MS	0.0014635	0.0012902	-0.00018672	0.00051022	-1.3525e-05
PDH_R_FH	-0.0036672	0.0053715	-0.001387	-0.003842	-0.0029147
PDH_R_7 d AFH	-0.0049035	0.0027646	-0.0010499	0.0013692	0.0034603
PDH_R_14 d AFH	-0.0072578	0.0019135	-0.002198	0.0031052	0.0014173
PDH_R_21 d AFH	-0.0087179	0.0039804	-0.0024703	-0.0024678	-0.0032048
PDH_R_MS	-0.0070636	0.0020962	-0.0049796	-0.010631	-0.0050408
P5CS_R_FH	-0.019586	0.02539	0.007299	-0.0039092	0.010029
P5CS_R_7 d AFH	-0.013498	0.030007	-0.0041228	-0.023011	0.0016825
P5CS_R_14 d AFH	-0.0057815	0.025444	0.013746	0.0016314	0.007085
P5CS_R_21 d AFH	-0.004579	0.025886	0.0082838	0.0075011	0.0010501
P5CS_R_MS	-0.015848	0.015845	0.01707	-0.011906	0.0084843
DAO_R_FH	0.0097246	0.033885	0.014563	0.054817	0.056425
DAO_R_7 d AFH	0.024161	-0.032669	0.053887	0.039387	-0.015745
DAO_R_14 d AFH	0.069705	-0.016826	0.025448	0.03314	-0.005518
DAO_R_21 d AFH	0.083107	-0.023525	0.041041	0.04031	-0.032945
DAO_R_MS	0.028601	-0.022189	-0.0059264	0.038166	0.0486
OAT_R_FH	0.0033748	0.0079308	0.0029201	0.0038647	0.0035594
OAT_R_7 d AFH	0.0014076	0.0036191	0.011798	0.0042177	0.0036272
OAT_R_14 d AFH	0.00097636	-0.0015481	0.013465	0.0036286	0.0065104
OAT_R_21 d AFH	0.0034962	0.00090108	0.016121	0.010516	0.0033859
OAT_R_MS	0.00061325	0.0046577	0.010825	0.0043655	0.0069758
