# Supplementary material for: Nitrogen application and different water regimes at booting stage improved yield and 2-acetyl-1-pyrroline (2AP) formation in fragrant rice
Source: Rice (N Y). 2019 Oct 3;12:74. doi: 10.1186/s12284-019-0328-4 (PMC6776583; doi:10.1186/s12284-019-0328-4)
Supplement: Supplementary file 2 — Table S2. PLS-DA_loadings (XLSX 19 kb) [file 12284_2019_328_MOESM2_ESM.xlsx]

## Sheet: PLS-DA loadings
Supplementary Table 2 Supplementary Table 2 PLS-DA_loadings
Parameters	Comp 1	Comp 2	Comp 3	Comp 4	Comp 5
2AP_G	0.10904	-0.14996	-0.051271	0.16848	-0.029851
2AP_G_7 d AFH	0.042216	0.2533	-0.25124	0.066145	-0.050273
2AP_G_14 d AFH	-0.032633	0.96881	-0.60635	0.48332	-0.081889
2AP_G_21 d AFH	0.21042	0.48223	-0.60773	0.47357	-0.30039
2AP_G_MS	0.18234	0.16672	-0.33429	0.37745	-0.1454
2AP_L_FH	0.6244	-0.88234	0.39941	0.099068	-0.097472
2AP_L_7 d AFH	0.577	-0.63476	0.19165	0.47632	-0.14104
2AP_L_14 d AFH	-0.13784	-0.061051	0.21574	0.26177	-1.0992
2AP_L_21 d AFH	0.77218	-0.017264	-0.14365	-0.45394	-0.044103
2AP_L_MS	0.25925	-0.34234	-0.082866	-0.082255	0.39971
2AP_SS_FH	0.044064	0.22778	0.025285	-0.37016	0.20115
2AP_SS_7 d AFH	0.060431	0.027107	0.038987	-0.13536	0.046036
2AP_SS_14 d AFH	-0.041809	0.10818	0.03416	-0.22555	0.13266
2AP_SS_21 d AFH	0.092143	-0.18911	0.0019401	0.088757	-0.068712
2AP_SS_MS	0.10381	0.0059805	-0.074735	-0.042382	0.1013
Pro_G_7 d AFH	0.012598	0.028886	-0.026024	0.0080442	0.0083898
Pro_G_14 d AFH	0.0018701	0.035307	-0.025746	0.0014337	-0.023069
Pro_G_21 d AFH	-0.00010906	0.022989	-0.0098124	-0.0015028	0.0082621
Pro_G_MS	-0.00067127	0.029196	-0.0096727	-0.00085845	0.0026883
P5C_G_7 d AFH	0.00095337	0.0021816	0.0014479	0.00042046	0.00019534
P5C_G_14 d AFH	0.00096945	7.8961e-05	0.00039679	0.00089793	-0.00020514
P5C_G_21 d AFH	0.001168	0.00079784	0.00046193	0.001023	0.00013447
P5C_G_MS	0.0009653	-0.00090488	0.00025118	0.0014182	-0.0024615
PDH_G_7 d AFH	0.00054723	-0.014862	0.0068509	0.0010216	-0.0032848
PDH_G_14 d AFH	0.0037757	-0.0084026	0.0063656	-0.0038009	-0.0029588
PDH_G_21 d AFH	0.0026992	-0.01525	0.0095333	0.00088271	0.015969
PDH_G_MS	0.0026192	-0.013078	0.0096786	-0.0097709	0.0038556
P5CS_G_7 d AFH	0.025731	-0.012324	0.0042036	-0.012064	-0.029848
P5CS_G_14 d AFH	0.027088	-0.034131	0.0058786	-0.00072185	0.006827
P5CS_G_21 d AFH	0.033802	-0.023705	-0.0060961	-0.0017216	-0.0019315
P5CS_G_MS	0.044721	-0.032272	0.0085429	-0.019521	-0.0066907
DAO_G_7 d AFH	0.067118	0.22646	-0.048136	0.024094	0.035678
DAO_G_14 d AFH	0.084651	0.32767	0.019475	-0.016993	0.23748
DAO_G_21 d AFH	0.093757	0.27077	0.078404	-0.306	0.14881
DAO_G_MS	0.034079	0.24877	-0.040663	-0.17463	0.055453
OAT_G_7 d AFH	0.003712	0.021502	-0.002146	-0.019925	0.0088906
OAT_G_14 d AFH	0.00097043	0.025671	-0.0097525	-0.0092228	-0.0045534
OAT_G_21 d AFH	0.0061463	0.022471	-0.0044032	-0.01529	-0.0053928
OAT_G_MS	0.01625	0.019994	-0.0085164	-0.016818	0.0052553
Pro_L_FH	0.0012415	0.0020694	-0.0020412	0.0010238	0.0091311
Pro_L_7 d AFH	0.0025433	-0.025003	0.0032986	0.0093335	0.010522
Pro_L_14 d AFH	0.00043836	-0.01479	0.0090165	-0.003681	-0.00050799
Pro_L_21 d AFH	-0.016873	0.012818	0.0060265	-0.015003	0.016341
Pro_L_MS	-0.023704	0.030895	-0.0059968	0.0029552	0.036403
P5C_L_FH	4.1905e-06	0.0010696	-0.00071933	0.0017357	-0.0012092
P5C_L_7 d AFH	0.0013812	-0.00020052	-0.00048035	0.0017607	-0.0013724
P5C_L_14 d AFH	0.00072618	-0.00012817	-0.0012974	0.0011071	-0.0026976
P5C_L_21 d AFH	0.00052022	-0.0002659	-0.00016458	-7.086e-05	-0.00089769
P5C_L_MS	-9.7025e-06	-0.0010089	0.0002386	0.00070734	-0.0010058
PDH_L_FH	0.00070988	-0.0092596	0.0073994	-0.0018465	0.0017851
PDH_L_7 d AFH	0.005597	-0.016436	0.0067979	0.0025116	-5.3157e-05
PDH_L_14 d AFH	0.0048799	-0.012181	0.0093605	-0.0022306	-0.0037177
PDH_L_21 d AFH	0.002275	-0.01282	0.0077431	0.0040518	0.010741
PDH_L_MS	-0.0020889	-0.017796	0.010949	-0.0040504	0.01135
P5CS_L_FH	0.027745	-0.042015	0.018421	0.0007758	-0.011697
P5CS_L_7 d AFH	0.038826	-0.033752	0.015172	8.0233e-05	-0.0229
P5CS_L_14 d AFH	0.026933	-0.040739	0.028553	-0.008457	-0.0083457
P5CS_L_21 d AFH	0.019553	-0.026918	0.013359	-0.02233	0.0035055
P5CS_L_MS	0.017154	-0.032208	0.024477	-0.028338	0.014583
DAO_L_FH	0.13439	0.22385	-0.053299	-0.12257	-0.077025
DAO_L_7 d AFH	0.1154	0.1786	-0.032523	-0.17317	-0.036581
DAO_L_14 d AFH	0.066032	0.048557	-0.032703	-0.034448	-0.069858
DAO_L_21 d AFH	0.087848	0.12183	-0.02745	-0.030298	-0.088926
DAO_L_MS	0.071972	0.13197	0.0010692	-0.15022	-0.10764
OAT_L_FH	0.01872	0.033799	-0.010077	-0.010514	-0.0042118
OAT_L_7 d AFH	0.028812	0.033733	-0.0071498	-0.012881	0.0050629
OAT_L_14 d AFH	0.028665	0.051494	-0.01172	-0.020205	-0.0088678
OAT_L_21 d AFH	0.03537	0.061916	-0.012109	-0.012246	-0.015178
OAT_L_MS	0.047065	0.0204	-0.010429	-0.010825	-0.010912
Pro_SS_FH	-0.0011508	-0.026255	0.0047021	0.016328	0.018034
Pro_SS_7 d AFH	0.010096	-0.047955	0.0085623	0.013819	0.0061651
Pro_SS_14 d AFH	0.0082221	-0.025998	-0.0014708	0.0089443	-0.0036127
Pro_SS_21 d AFH	0.0052208	-0.043443	-0.0043577	0.011677	-0.00781
Pro_SS_MS	-0.0060089	0.011125	-0.0074101	0.0055113	0.021701
P5C_SS_FH	0.00041876	0.0023311	-0.0026487	0.002248	-0.0014105
P5C_SS_7 d AFH	0.00070653	0.00091016	-0.0014181	0.0020493	-0.00066923
P5C_SS_14 d AFH	0.00079745	0.00035026	-0.0013992	0.0018507	-0.0012792
P5C_SS_21 d AFH	0.00085824	0.0011649	-0.0014327	0.00082226	-0.0012034
P5C_SS_MS	0.00047805	0.0015926	-0.0020079	0.0027592	-0.0018499
PDH_SS_FH	0.0046579	-0.0072675	0.00037811	0.00274	0.0024849
PDH_SS_7 d AFH	0.0060964	-0.013236	0.003345	-0.00037823	-0.00068436
PDH_SS_14 d AFH	0.0056242	-0.0085264	0.0096926	-0.0050934	-0.0026053
PDH_SS_21 d AFH	0.0071012	-0.023053	0.006728	0.0045904	0.0053589
PDH_SS_MS	-0.004138	-0.019585	0.0070801	0.0034232	0.011345
P5CS_SS_FH	0.029212	-0.021549	-0.0014829	-0.00019986	-0.0013378
P5CS_SS_7 d AFH	0.043043	-0.082718	0.0071058	0.029525	0.0089538
P5CS_SS_14 d AFH	0.037019	-0.027311	0.010011	-0.0083764	-0.0010606
P5CS_SS_21 d AFH	0.034473	-0.0098276	-0.010328	0.0041725	-0.017196
P5CS_SS_MS	0.028843	-0.044401	0.011442	-0.017166	0.012196
DAO_SS_FH	0.026603	0.078333	-0.06741	-0.0023501	-0.048023
DAO_SS_7 d AFH	0.036661	0.19713	-0.027313	-0.081618	0.054971
DAO_SS_14 d AFH	-0.0063652	-0.014239	-0.01585	0.025959	0.053701
DAO_SS_21 d AFH	0.023225	0.14687	-0.060881	-0.025097	0.057609
DAO_SS_MS	-0.058975	0.12457	-0.027355	-0.063034	-0.0519
OAT_SS_FH	0.011004	0.01482	-0.012869	0.0083894	-0.013134
OAT_SS_7 d AFH	0.019939	0.0072118	-0.006299	-0.010866	-0.0021725
OAT_SS_14 d AFH	0.015562	0.029562	-0.00566	-0.021014	-8.4493e-05
OAT_SS_21 d AFH	0.0092629	0.031223	-0.0076542	-0.016498	-0.013643
OAT_SS_MS	0.018078	0.0090601	-0.0075778	-0.0025835	-0.00326
Pro_R_FH	0.0015119	-0.0031572	-0.0017944	0.0033325	0.00040411
Pro_R_7 d AFH	0.0023508	0.0050058	-0.0060833	0.0022995	-0.0010636
Pro_R_14 d AFH	0.0016134	0.001086	0.00021472	0.00094175	0.0026746
Pro_R_21 d AFH	0.00027459	0.012017	-0.0081218	0.003613	-0.0074566
Pro_R_MS	0.0020832	0.016612	-0.010019	0.0048085	0.0024631
P5C_R_FH	-0.00014481	0.001739	-0.0015975	0.0025578	-0.0028104
P5C_R_7 d AFH	0.00052369	0.00099309	-0.0015223	0.0020157	-0.00074412
P5C_R_14 d AFH	0.00025495	0.0013152	-0.0014421	0.001495	-0.0019031
P5C_R_21 d AFH	0.0014456	0.00017229	-0.00095778	0.0013033	-0.001723
P5C_R_MS	0.00083941	0.0018141	-0.0015306	0.0019228	-0.0012413
PDH_R_FH	0.0063978	-0.01101	0.002825	0.0027586	0.0015465
PDH_R_7 d AFH	0.0046557	-0.0083561	0.0050115	-0.0011417	-0.0037147
PDH_R_14 d AFH	0.0040965	-0.012042	0.0079656	-0.0024593	-0.0040119
PDH_R_21 d AFH	0.006015	-0.020431	0.0079553	-0.00074143	0.0039704
PDH_R_MS	0.0017532	-0.019769	0.0077747	0.0031308	0.010209
P5CS_R_FH	0.039154	-0.039982	0.011039	-0.0047062	-0.0069923
P5CS_R_7 d AFH	0.034636	-0.049556	0.0073335	0.018067	0.016075
P5CS_R_14 d AFH	0.037738	-0.010476	-0.0038955	-0.00053321	-0.0052801
P5CS_R_21 d AFH	0.034258	-0.018817	-0.0057248	0.0022148	-0.018409
P5CS_R_MS	0.032366	-0.018963	0.0073057	-0.013677	0.011016
DAO_R_FH	0.043914	0.01929	-0.022242	-0.00077267	-0.082834
DAO_R_7 d AFH	-0.0089786	0.15474	-0.019251	-0.051063	-0.0051366
DAO_R_14 d AFH	-0.029977	0.14934	-0.072125	0.0093782	-0.025318
DAO_R_21 d AFH	-0.032819	0.1963	-0.087106	-0.0026543	-0.04639
DAO_R_MS	-0.035006	0.072298	-0.017417	0.0039437	-0.038819
OAT_R_FH	0.0094449	0.0056563	-0.0055493	0.0033016	-0.010794
OAT_R_7 d AFH	0.00991	0.011585	-0.0058576	-0.007935	-0.0012821
OAT_R_14 d AFH	0.0056301	0.017956	-0.0040508	-0.01274	-0.00040781
OAT_R_21 d AFH	0.0089459	0.023359	-0.0081065	-0.013162	-0.006179
OAT_R_MS	0.011186	0.011087	-0.0043856	-0.0072953	-0.0054189
